# Supplementary material for: Uptake and translocation of polymeric nanoparticulate drug delivery systems into ryegrass
Source: Royal Society of Chemistry journal article supplement (doi:10.1039/c2ra21469e), 2012-01-01
Supplement: c2ra21469e.pdf [file c2ra21469e.pdf]

## Support information:

Figure S1 shows the emission fluorescence spectra of Nile red-loaded PNDDS of all particle sizes with the excitation wavelength of 549 nm. The spectra had a maximum at a wavelength varying from 610 nm to 640 nm depending on the size of PNDDS. This variation was presumably due to the differences in average intermolecular distances between Nile red molecules for each formulation and the presence of polystyrene molecules.

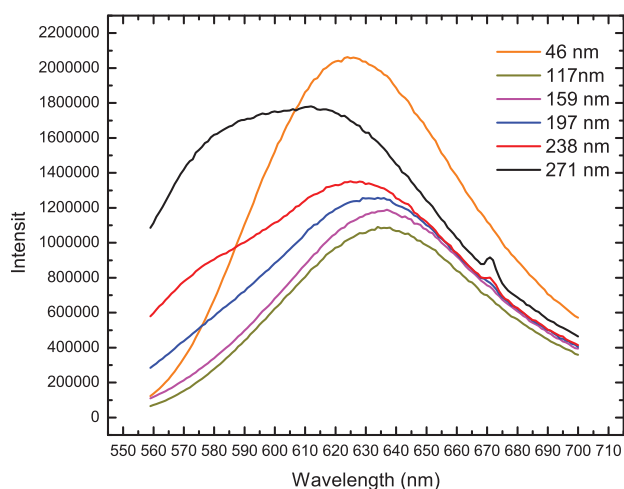

**Figure S1.** Emission fluorescence spectra of PNDDS of different sizes. The emission maxima were recorded at the wavelength varying from 610 nm to 640 nm depending on the formulations used to create PNDDS.

To determine the relationship between the emission fluorescence maxima and PNDDS concentration, PNDDS of all sizes were diluted into 0.5, 0.25, and 0.1 times their initial concentrations, and their emission maxima were measured by SFM. Figure S2 shows the linear fit results of emission maxima of PNDDS versus the concentrations of PNDDS. It shows that the emission maxima are proportional to the concentration of PNDDS of all particle sizes. With these obtained fit equations, the concentrations of PNDDS during uptake experiment for all times were calculated as a function of time.

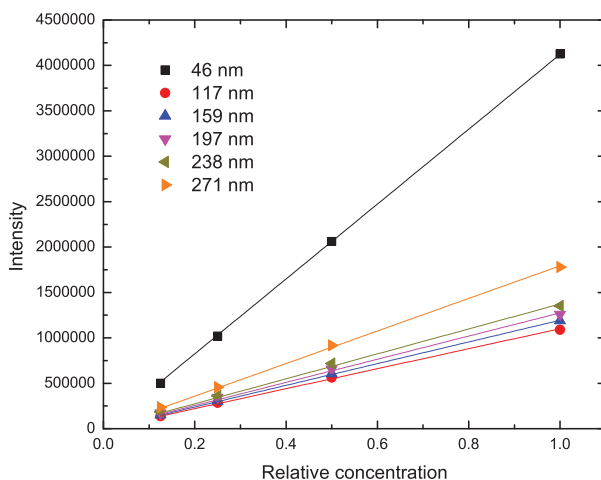

**Figure S2.** Linear fit of the SFM maximum intensity versus concentration of PNDDS. All PNDDS show good linear fit. The fit equation is used to determine the concentration of PNDDS during uptake experiments.

Movie S1 shows confocal microscopy images focusing on the different planes of a root after dipping it in 159-nm PNDDS solution for 81 hrs. The movie clearly reveals that PNDDS not only adsorb onto the root surface, but also uptake into root interior.

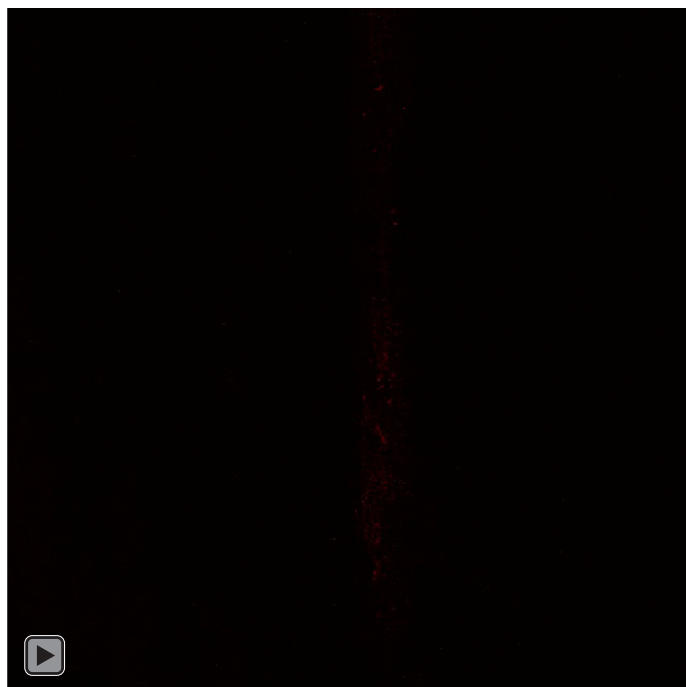

**Movie S1.** Confocal microscopy images focusing on the different planes of a root after dipping it in 159-nm PNDDS solution for 81 hrs.

Tables S1 and S2 show the fit result of  $k_a$  and  $\Gamma^*k_{up}$  obtained when  $\Gamma^* = 0.8$  and  $0.4 \text{ g/m}^2$ . By comparing these two tables to Table 2 in the main text, we can see that regardless of the choice of  $\Gamma^*$  value ( $\Gamma^* = 0.4, 0.6, \text{ or } 0.8 \text{ g/m}^2$ ),  $k_a$  and  $k_{up}$  gave rise to similar order of magnitudes; and  $k_{up}$  increased with decreasing PNDDS size.

**Table S1.** Fit results of  $k_a$ ,  $k_{up}$  and  $\Gamma^*k_{up}$  with  $\Gamma^* = 0.8$

| <b>Diameter (nm)</b> | <b><math>k_a</math> (m/hr)</b> | <b><math>k_{up}</math> (1/hr)</b> | <b><math>k_a m_{s,0}</math> (g/(m<sup>2</sup>·hr))</b> | <b><math>\Gamma^*k_{up}</math> (g/(m<sup>2</sup>·hr))</b> |
|----------------------|--------------------------------|-----------------------------------|--------------------------------------------------------|-----------------------------------------------------------|
| 46                   | 0.0046                         | 0.1386                            | 0.6118                                                 | 0.1123                                                    |
| 117                  | 0.0018                         | 0.0764                            | 0.2394                                                 | 0.0619                                                    |
| 159                  | 0.0014                         | 0.0333                            | 0.1862                                                 | 0.0270                                                    |
| 197                  | 0.0009                         | 0.0232                            | 0.1197                                                 | 0.0188                                                    |
| 238                  | 0.0015                         | 0.0184                            | 0.1995                                                 | 0.0149                                                    |
| 271                  | 0.0018                         | 0.0031                            | 0.2394                                                 | 0.0025                                                    |

**Table S2.** Fit results of  $k_a$ ,  $k_{up}$  and  $\Gamma^*k_{up}$  with  $\Gamma^* = 0.4$

| <b>Diameter (nm)</b> | <b><math>k_a</math> (m/hr)</b> | <b><math>k_{up}</math> (1/hr)</b> | <b><math>k_a m_{s,0}</math> (g/(m<sup>2</sup>·hr))</b> | <b><math>\Gamma^*k_{up}</math> (g/(m<sup>2</sup>·hr))</b> |
|----------------------|--------------------------------|-----------------------------------|--------------------------------------------------------|-----------------------------------------------------------|
| 46                   | 0.0325                         | 0.2432                            | 4.3225                                                 | 0.1970                                                    |
| 117                  | 0.0046                         | 0.1433                            | 0.6118                                                 | 0.1161                                                    |
| 159                  | 0.0033                         | 0.0799                            | 0.4389                                                 | 0.0647                                                    |
| 197                  | 0.0014                         | 0.0663                            | 0.1862                                                 | 0.0537                                                    |
| 238                  | 0.0044                         | 0.0566                            | 0.5852                                                 | 0.0458                                                    |
| 271                  | 0.0030                         | 0.0339                            | 0.3990                                                 | 0.0275                                                    |
